# Supplementary material
Source: PubMed Central journal article supplement (PMC4424090)
Supplement: NIHMS663028-supplement-2.pdf [file NIHMS663028-supplement-2.pdf]

EPILEPSY QUESTIONNAIRE  
 DEPARTMENT OF NEUROLOGY, BAYLOR COLLEGE OF MEDICINE  
 PAGE 4 OF 4

DO YOU CURRENTLY HAVE ANY OF THE FOLLOWING SYMPTOMS/COMPLAINTS?

|                                 | NO | YES | DESCRIBE (If "yes")     |
|---------------------------------|----|-----|-------------------------|
| Weight gain                     |    | ✓   | TOO Much                |
| Weight loss                     | ✓  |     |                         |
| Easy fatigue                    |    | ✓   | x After a seizure       |
| Change in sleep pattern         |    | ✓   | Sleep on couch          |
| Stomach pain                    |    | ✓   | bowel movements         |
| Loss of appetite                |    | ✓   | At times                |
| Nausea, vomiting                |    | ✓   |                         |
| Heartburn                       |    | ✓   | gerd                    |
| Diarrhea                        |    | ✓   |                         |
| Constipation                    |    | ✓   | Back & forth            |
| Change in color of stool        | ✓  |     |                         |
| Chest Pain                      | ✓  |     |                         |
| Palpitations (funny heart beat) |    | ✓   |                         |
| Night sweats                    |    | ✓   |                         |
| Cough                           |    | ✓   |                         |
| Shortness of breath             |    | ✓   |                         |
| Wheezing                        | ✓  |     |                         |
| Chest pain with deep breathing  | ✓  |     |                         |
| Pain with urination             | ✓  |     |                         |
| Frequent urination              | ✓  |     |                         |
| Urinary incontinence            | ✓  |     |                         |
| Blood in urine                  | ✓  |     |                         |
| Skin rash                       | ✓  |     |                         |
| Joint pains                     |    | ✓   |                         |
| Muscle cramps                   |    | ✓   |                         |
| Weakness                        |    | ✓   | ti <del>red</del> tired |
| Numbness                        |    | ✓   | hands & arms            |
| Double vision                   |    | ✓   |                         |
| Difficulty swallowing           |    | ✓   |                         |
| Slurred speech                  |    | ✓   |                         |
| Dizziness                       |    | ✓   |                         |
| Headaches                       |    | ✓   |                         |
| Poor control of bladder         | ✓  |     |                         |
| Tremors / hand shaking          |    | ✓   | Drops objects           |
| Loss of muscle bulk             | ✓  |     |                         |
| Fainting spells                 | ✓  |     |                         |
| Poor condition                  |    | ✓   | since having seizure.   |
| Droopy face or eye              | ✓  |     |                         |
| Neck / back pain                |    | ✓   | After seizures          |
| Change in vision                |    | ✓   |                         |
| Change in hearing               | ✓  |     |                         |
| Stability/Mobility              |    | ✓   | poor balance            |
| Memory                          |    | ✓   | Difficult w/ short t    |

## ROS TYPE 2

Please review the list of symptoms and check "yes" if you have any of these symptoms currently. Please check "no" if you have not experienced any of the symptoms.

### Constitutional (1)

- Yes  No Fever / Chills / Sweats  
 Yes  No Weight Loss  
 Yes  No Tiredness / Fatigue  
 Yes  No Poor Appetite

### Eyes (2)

- Yes  No Reduced Vision or Blurriness  
 Yes  No Double Vision  
 Yes  No Droopy Eye Lids  
 Yes  No Cataracts  
 Yes  No Glaucoma

### Ears/Mouth/Nose/Throat (3)

- Yes  No Hearing Loss  
 Yes  No Ringing in the Ears  
 Yes  No Vertigo  
 Yes  No Hoarseness  
 Yes  No Sinus Pain  
 Yes  No Swallowing Problem

### Cardiovascular (4)

- Yes  No Chest Pain/Angina  
 Yes  No Palpitations  
 Yes  No Shortness of Breath Lying Flat  
 Yes  No Pain in the Legs with Walking  
 Yes  No Phlebitis  
 Yes  No Heart Attack  
 Yes  No High Blood Pressure  
 Yes  No High Cholesterol/Lipids

### Respiratory (5)

- Yes  No Cough  
 Yes  No Phlegm  
 Yes  No Coughing up Blood  
 Yes  No Wheezing/Asthma

### Gastrointestinal (6)

- Yes  No Abdominal Pain  
 Yes  No Nausea and/or Vomiting  
 Yes  No Vomiting up Blood  
 Yes  No Change in Bowl Movements  
 Yes  No Diarrhea  
 Yes  No Constipation  
 Yes  No Blood in Stool

### Genitourinary (7)

- Yes  No Pain with Urination  
 Yes  No Excessive Urination  
 Yes  No Incontinence  
 Yes  No Blood in Urine  
 Yes  No Sexual Problems  
 Yes  No Prostate Problems

### Musculoskeletal (8)

- Yes  No Neck or Back Pain  
 Yes  No Muscle Pain  
 Yes  No Pain/Redness/Swelling of a Joint

### Skin (9)

- Yes  No Rash  
 Yes  No Change in Sweating

- Yes  No Burns

### Neurologic (10)

- Yes  No Headache  
 Yes  No Numbness or Tingling  
 Yes  No Muscle Weakness  
 Yes  No Loss of Consciousness (fainting)  
 Yes  No Memory or Thinking Problems  
 Yes  No Trouble with Walking or Balance  
 Yes  No Stroke  
 Yes  No Seizure

### Psychiatric (11)

- Yes  No Psychological or Psychiatric Care  
 Yes  No Depression  
 Yes  No Hallucinations  
 Yes  No Anxiety  
 Yes  No Suicidal Thoughts

### Endocrine (12)

- Yes  No Hot Cold Intolerance  
 Yes  No Thyroid Problems  
 Yes  No Diabetes or Sugar Problems

### Hematologic/Lymphatic (13)

- Yes  No Anemia  
 Yes  No Easy Bruising  
 Yes  No Enlarged Lymph Nodes

### Allergic/Immunologic (14)

- Yes  No Severe Allergic Reaction  
 Yes  No Frequent Infections

**Do you have difficulties with any of the following activities?** (Please CHECK as these apply)

- |                                                                     |              |                                                                     |                    |                                                                     |                 |
|---------------------------------------------------------------------|--------------|---------------------------------------------------------------------|--------------------|---------------------------------------------------------------------|-----------------|
| <input type="checkbox"/> Yes <input checked="" type="checkbox"/> No | Bathing      | <input checked="" type="checkbox"/> Yes <input type="checkbox"/> No | Driving            | <input checked="" type="checkbox"/> Yes <input type="checkbox"/> No | Cleaning        |
| <input type="checkbox"/> Yes <input checked="" type="checkbox"/> No | Toileting    | <input checked="" type="checkbox"/> Yes <input type="checkbox"/> No | Dressing           | <input type="checkbox"/> Yes <input type="checkbox"/> No            | Shopping        |
| <input type="checkbox"/> Yes <input checked="" type="checkbox"/> No | Eating       | <input type="checkbox"/> Yes <input checked="" type="checkbox"/> No | Taking medications | <input type="checkbox"/> Yes <input checked="" type="checkbox"/> No | Using the Phone |
| <input checked="" type="checkbox"/> Yes <input type="checkbox"/> No | Paying Bills | <input checked="" type="checkbox"/> Yes <input type="checkbox"/> No | Cooking            | <input checked="" type="checkbox"/> Yes <input type="checkbox"/> No | Traveling       |

**Have you used the following services in the past three months?** (Please CHECK as these apply)

- |                                                                     |                      |                                                                     |                      |                                                                     |                        |
|---------------------------------------------------------------------|----------------------|---------------------------------------------------------------------|----------------------|---------------------------------------------------------------------|------------------------|
| <input type="checkbox"/> Yes <input checked="" type="checkbox"/> No | Visiting Nurse       | <input type="checkbox"/> Yes <input checked="" type="checkbox"/> No | Home Health Services | <input type="checkbox"/> Yes <input checked="" type="checkbox"/> No | Day Program            |
| <input type="checkbox"/> Yes <input checked="" type="checkbox"/> No | Physical Therapy     | <input type="checkbox"/> Yes <input checked="" type="checkbox"/> No | Meal Program         | <input type="checkbox"/> Yes <input checked="" type="checkbox"/> No | Mental Health Services |
| <input type="checkbox"/> Yes <input checked="" type="checkbox"/> No | Occupational Therapy | <input type="checkbox"/> Yes <input checked="" type="checkbox"/> No | Speech Therapy       | <input type="checkbox"/> Yes <input checked="" type="checkbox"/> No | Other                  |

**PLEASE BRING COMPLETED FORM TO YOUR APPOINTMENT**  
**Please bring Insurance cards (Authorization if Needed)**  
**And available x-rays, MRI scans and previous medical records**  
**THANK YOU FOR COMPLETING THIS FORM**

Reviewed by Dr.: \_\_\_\_\_ Date Reviewed: \_\_\_\_\_

ROS TYPE 3

**REVIEW OF SYSTEMS**

| Please check yes or no for the following problems & conditions:                          | Yes | No           |
|------------------------------------------------------------------------------------------|-----|--------------|
| <b>General:</b> Nausea/Vomiting?                                                         |     | X            |
| Fever/Chills?                                                                            |     | X            |
| Weight loss or gain? Please specify: 10-15 lbs in 12 months                              | X   | <del>X</del> |
| <b>Skin:</b> Rashes?                                                                     |     | X            |
| Skin Color Changes                                                                       |     | X            |
| <b>Heent:</b> Recent changes in vision?                                                  |     | X            |
| Persistent Cough?                                                                        |     | X            |
| <b>Cardiac:</b> Chest Pain?                                                              |     | X            |
| Angioplasty or stents for the heart?                                                     |     | X            |
| Recent EKG or Stress Test?                                                               | X   |              |
| <b>Respiratory:</b> Shortness of breath?                                                 |     | X            |
| Can you walk up a flight of stairs without stopping?                                     | X   |              |
| <b>Vascular:</b> Circulation problems in the legs?                                       |     | X            |
| Pain in your legs when you walk?                                                         |     | X            |
| Angioplasty or bypass surgery for the legs?                                              |     | X            |
| Foot wounds that would not heal?                                                         |     | X            |
| Leg swelling?                                                                            |     | X            |
| Varicose veins?                                                                          |     | X            |
| <b>Neurologic:</b> Weakness or numbness on one side of the body?<br>small fingers (both) | X   |              |
| Dizziness/Fainting Spells?                                                               |     | X            |
| Loss of vision?                                                                          |     | X            |

|                                                               |   |   |
|---------------------------------------------------------------|---|---|
| <b>GI: Abdominal Pain?</b>                                    |   | X |
| Acid Reflux?                                                  |   | X |
| Stomach ulcers?                                               |   | X |
| Stomach pain with eating?                                     |   | X |
| Change in bowel movements? <del>#</del> loose & running stool | X |   |
| <b>Musculoskeletal: Back Pain?</b>                            |   | X |
| Painful Joints?                                               |   | X |
| <b>Heme/Onc: Bleeding/Disorder</b>                            |   | X |

The above ROS were reviewed with patient. **Physician Initials:** \_\_\_\_\_

**MEDICATIONS**

Please list the medications you take, the dose, and how often you take them.

See list

---



---



---



---



---

**REVIEW OF SYSTEMS by SYSTEMS – Page 4**

**Do you currently have any of these symptoms?**

| <u>Head and Neck</u>  | YES   | NO |
|-----------------------|-------|----|
| Swelling              | _____ | ✓  |
| Masses                | _____ | ✓  |
| Hoarseness            | _____ | ✓  |
| Difficulty swallowing | _____ | ✓  |
| Neck pain             | _____ | ✓  |
| Neck spasm            | _____ | ✓  |

| <u>Neuromuscular</u>            | YES   | NO |
|---------------------------------|-------|----|
| Cramps                          | _____ | ✓  |
| Weakness in limbs               | _____ | ✓  |
| Loss of control of arms of legs | _____ | ✓  |
| Poor coordination               | _____ | ✓  |
| Numbness                        | _____ | ✓  |
| Tingling                        | _____ | ✓  |
| Loss of sensation               | _____ | ✓  |
| Loss of muscle                  | _____ | ✓  |
| Poor vision                     | _____ | ✓  |
| Blurry vision                   | _____ | ✓  |
| Double vision                   | _____ | ✓  |
| Loss of hearing                 | _____ | ✓  |
| Ringing in ears                 | _____ | ✓  |
| Numbness in face                | _____ | ✓  |
| Decreased ability to smell      | _____ | ✓  |
| Decreased ability to taste      | _____ | ✓  |
| Droopy face or eye              | _____ | ✓  |
| Hoarseness                      | _____ | ✓  |
| Difficulty speaking             | _____ | ✓  |
| Difficulty with speech          | _____ | ✓  |
| Slurred speech                  | _____ | ✓  |

| <u>Cardio-respiratory</u> | YES   | NO |
|---------------------------|-------|----|
| Shortness of breath       | _____ | ✓  |
| Chest pain                | _____ | ✓  |
| Chronic cough             | _____ | ✓  |
| Coughing blood            | _____ | ✓  |
| Emphysema                 | _____ | ✓  |
| Bronchitis                | _____ | ✓  |
| Palpitations              | _____ | ✓  |

REVIEW OF SYSTEMS by SYSTEMS cont. – Page 5

---

Do you currently have any of these symptoms?

Gastro-Intestinal

YES

NO

Weight loss

\_\_\_\_\_

Blood in stool

\_\_\_\_\_

Dark colored stool

\_\_\_\_\_

Abdominal Pain

\_\_\_\_\_

Hernia

\_\_\_\_\_

Difficulty swallowing

\_\_\_\_\_

Nausea

\_\_\_\_\_

Vomiting

\_\_\_\_\_

Abdominal swelling

\_\_\_\_\_

Diarrhea

\_\_\_\_\_

Constipation

\_\_\_\_\_

Abdominal mass

\_\_\_\_\_

Genito-Urinary

YES

NO

Burning with urination

\_\_\_\_\_

Dark or discolored urine

\_\_\_\_\_

Difficulty urinating

\_\_\_\_\_

Poor control of bladder

\_\_\_\_\_

Any type of sexual dysfunction

\_\_\_\_\_

Excessive urination

\_\_\_\_\_

Excessive thirst

\_\_\_\_\_

Endocrine

YES

NO

Poor appetite

\_\_\_\_\_

Cold intolerance

\_\_\_\_\_

Dry skin

\_\_\_\_\_

Excessive thirst

\_\_\_\_\_

Hair loss

\_\_\_\_\_

Extreme nervousness

\_\_\_\_\_

Extreme weight gain

\_\_\_\_\_

Extreme weight loss

\_\_\_\_\_

Psychiatric

Psychiatric Issues/Problems (please list):

\_\_\_\_\_

\_\_\_\_\_

\_\_\_\_\_

\_\_\_\_\_

REVIEW OF SYSTEMS by SYSTEMS – Page 4

Do you currently have any of these symptoms?

Head and Neck

YES

NO

Swelling

\_\_\_\_\_

\_\_\_\_/✓

Masses

\_\_\_\_\_

\_\_\_\_/✓

Hoarseness

\_\_\_\_\_

\_\_\_\_/✓

Difficulty swallowing

\_\_\_\_\_

\_\_\_\_/✓

Neck pain

\_\_\_\_\_

\_\_\_\_/✓

Neck spasm

\_\_\_\_\_

\_\_\_\_/✓

Neuromuscular

YES

NO

Cramps

\_\_\_\_\_

\_\_\_\_/✓

Weakness in limbs

\_\_\_\_\_

\_\_\_\_/✓

Loss of control of arms of legs

\_\_\_\_\_

\_\_\_\_/✓

Poor coordination

\_\_\_\_\_

\_\_\_\_/✓

Numbness

\_\_\_\_/✓

\_\_\_\_\_

Tingling

\_\_\_\_/✓

\_\_\_\_\_

Loss of sensation

\_\_\_\_\_

\_\_\_\_/✓

Loss of muscle

\_\_\_\_\_

\_\_\_\_/✓

Poor vision

\_\_\_\_\_

\_\_\_\_/✓

Blurry vision

\_\_\_\_\_

\_\_\_\_/✓

Double vision

\_\_\_\_\_

\_\_\_\_/✓

Loss of hearing

\_\_\_\_\_

\_\_\_\_/✓

Ringing in ears

\_\_\_\_\_

\_\_\_\_/✓

Numbness in face

\_\_\_\_\_

\_\_\_\_/✓

Decreased ability to smell

\_\_\_\_\_

\_\_\_\_/✓

Decreased ability to taste

\_\_\_\_\_

\_\_\_\_/✓

Droopy face or eye

\_\_\_\_\_

\_\_\_\_/✓

Hoarseness

\_\_\_\_\_

\_\_\_\_/✓

Difficulty speaking

\_\_\_\_\_

\_\_\_\_/✓

Difficulty with speech

\_\_\_\_\_

\_\_\_\_/✓

Slurred speech

\_\_\_\_\_

\_\_\_\_/✓

Seizures

\_\_\_\_/✓

\_\_\_\_\_

Headaches

\_\_\_\_\_

\_\_\_\_/✓

Cardio-respiratory

YES

NO

Shortness of breath

\_\_\_\_\_

\_\_\_\_/✓

Chest pain

\_\_\_\_\_

\_\_\_\_/✓

Chronic cough

\_\_\_\_\_

\_\_\_\_/✓

Coughing blood

\_\_\_\_\_

\_\_\_\_/✓

Emphysema

\_\_\_\_\_

\_\_\_\_/✓

Bronchitis

\_\_\_\_\_

\_\_\_\_/✓

Palpitations

\_\_\_\_\_

\_\_\_\_/✓

Asthma

\_\_\_\_\_

\_\_\_\_/✓



**REVIEW OF SYSTEMS by SYSTEMS cont. – Page 5**

---

**Do you currently have any of these symptoms?**

**Gastro-Intestinal**

**YES**

**NO**

Weight loss

\_\_\_\_\_

\_\_\_\_\_✓

Blood in stool

\_\_\_\_\_

\_\_\_\_\_✓

Dark colored stool

\_\_\_\_\_

\_\_\_\_\_✓

Abdominal Pain

\_\_\_\_\_

\_\_\_\_\_✓

Hernia

\_\_\_\_\_

\_\_\_\_\_✓

Difficulty swallowing

\_\_\_\_\_

\_\_\_\_\_✓

Nausea

\_\_\_\_\_

\_\_\_\_\_✓

Vomiting

\_\_\_\_\_

\_\_\_\_\_✓

Abdominal swelling

\_\_\_\_\_

\_\_\_\_\_✓

Diarrhea

\_\_\_\_\_

\_\_\_\_\_✓

Constipation

\_\_\_\_\_

\_\_\_\_\_✓

Abdominal mass

\_\_\_\_\_

\_\_\_\_\_✓

**Genito-Urinary**

**YES**

**NO**

Burning with urination

\_\_\_\_\_

\_\_\_\_\_✓

Dark or discolored urine

\_\_\_\_\_

\_\_\_\_\_✓

Difficulty urinating

\_\_\_\_\_

\_\_\_\_\_✓

Poor control of bladder

\_\_\_\_\_

\_\_\_\_\_✓

Any type of sexual dysfunction

\_\_\_\_\_

\_\_\_\_\_✓

Excessive urination

\_\_\_\_\_

\_\_\_\_\_✓

Excessive thirst

\_\_\_\_\_

\_\_\_\_\_✓

**Endocrine**

**YES**

**NO**

Poor appetite

\_\_\_\_\_

\_\_\_\_\_✓

Cold intolerance

\_\_\_\_\_

\_\_\_\_\_✓

Dry skin

\_\_\_\_\_

\_\_\_\_\_✓

Excessive thirst

\_\_\_\_\_

\_\_\_\_\_✓

Hair loss

\_\_\_\_\_

\_\_\_\_\_✓

Extreme nervousness

\_\_\_\_\_

\_\_\_\_\_✓

Extreme weight gain

\_\_\_\_\_

\_\_\_\_\_✓

Extreme weight loss

\_\_\_\_\_

\_\_\_\_\_✓
